# Supplementary material
Source: Springer Nature journal article supplement (https://www.springermedizin.de/resource/supplementary/12958_2014_1297_MOESM2_ESM.pdf/9567032)

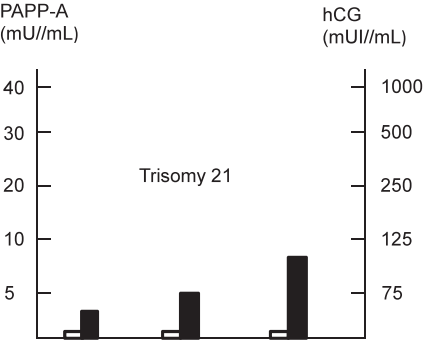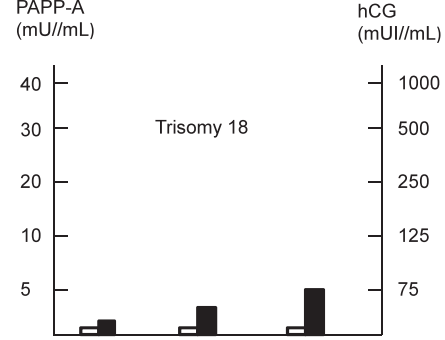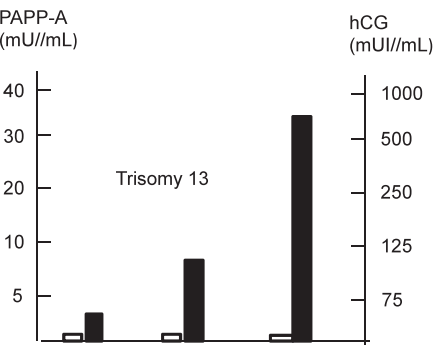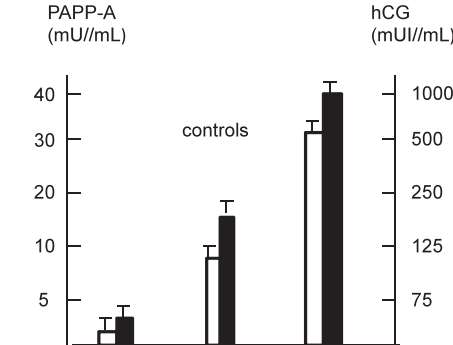

□ PAPP-A    ■ hCG

Supplement: MOESM2 [file 9567032]
